# Supplementary material
Source: Springer Nature journal article supplement (https://www.springermedizin.de/resource/supplementary/12889_2013_6155_MOESM6_ESM.pdf/9497050)

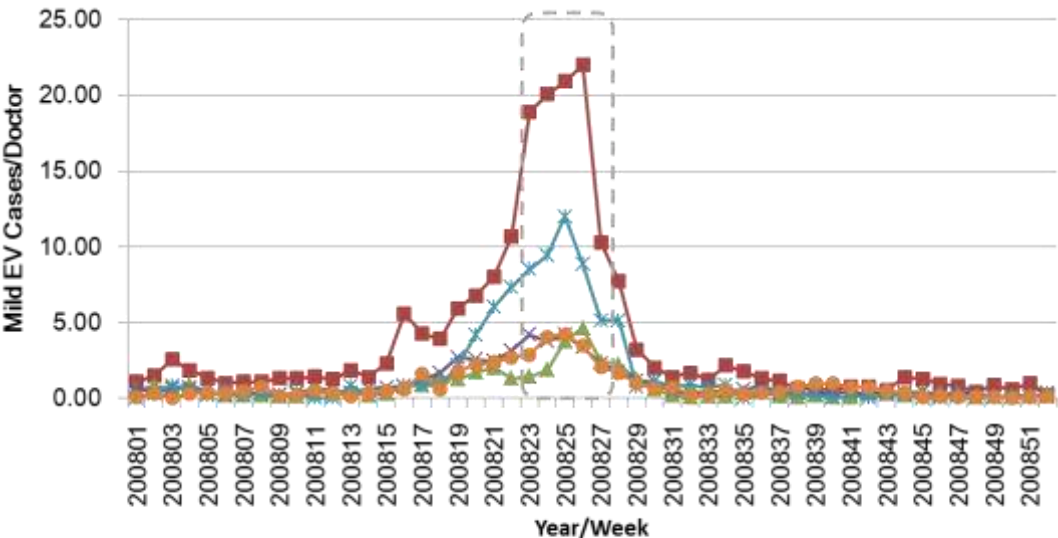

■ Tainan City    ▲ Nantou County    ✕ Yunlin County  
✕ Penghu County    ● Hualien County

Supplement: MOESM6 [file 9497050]
